# Supplementary material
Source: Springer Nature journal article supplement (https://www.springermedizin.de/resource/supplementary/12970_2007_40_MOESM1_ESM.pdf/9594286)

# Plasma choline concentrations ( $\mu\text{M}$ )

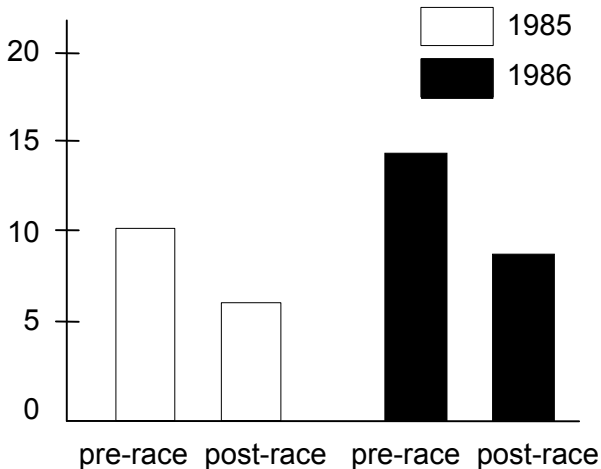

Supplement: MOESM1 [file 9594286]
